# Supplementary material for: Macrophages protect against sensory axon degeneration in diabetic neuropathy
Source: Research Square preprint supplement (doi:10.21203/rs.3.rs-3922035/v1), 2024-02-08
Supplement: Supplementary file 1 [file 2e11c0a7cb676a3a3525706d.pdf]

# Figure S1

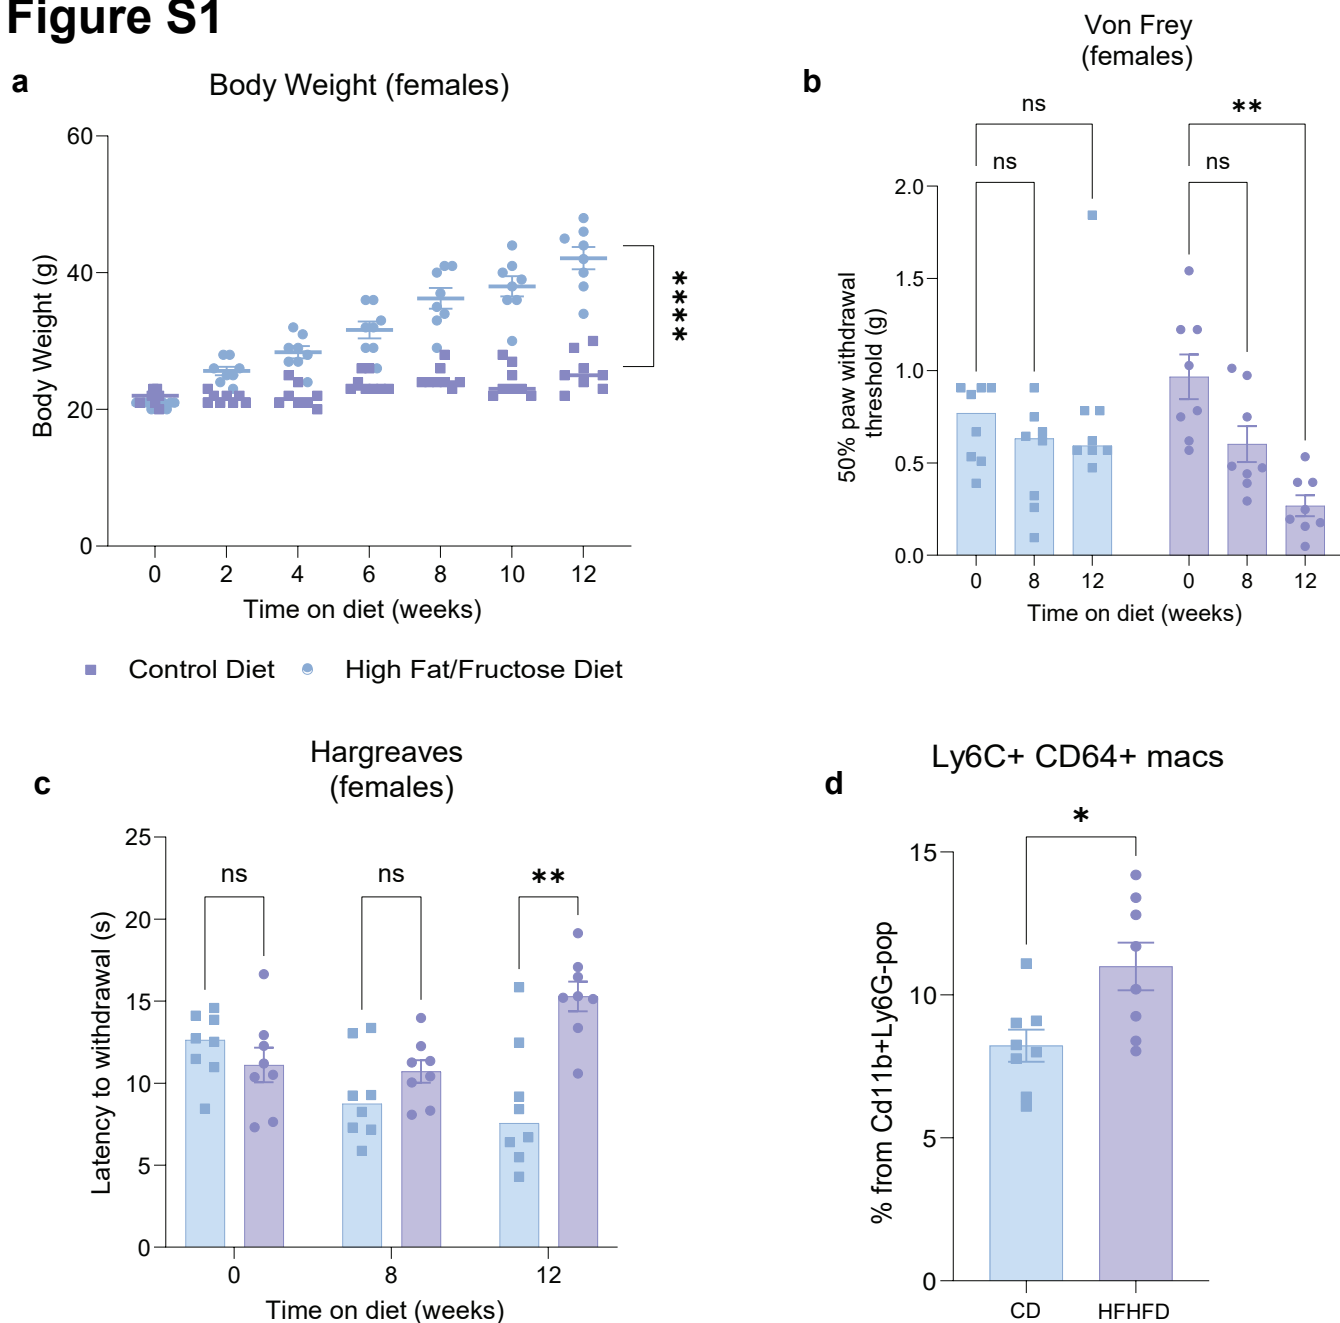

**Fig S1. Female mice on HFHFD are equally susceptible to weight gain, behavioral changes, and immune cell infiltration in nerves**

**a.** Body weight measurement over time on HFHFD vs CD feeding from female C57Bl6 mice (p-value <0.0001). **b.** Von Frey up down method was used to assess mechanical sensitivity in female mice fed HFHFD vs CD over 12 weeks (p-value 0 vs 12w = 0.0058). **c.** Hargreaves assay was used to assess heat sensitivity in female mice fed HFHFD vs CD over 12 weeks (p-value = 0.0044). **d.** Proportions of Ly6c+ CD64+ recruited macrophages from Live Cd45+ Cd11b+ cells in sciatic nerves of female mice fed HFHFD vs CD for 12 weeks (p-value = 0.0153).

## Figure S2

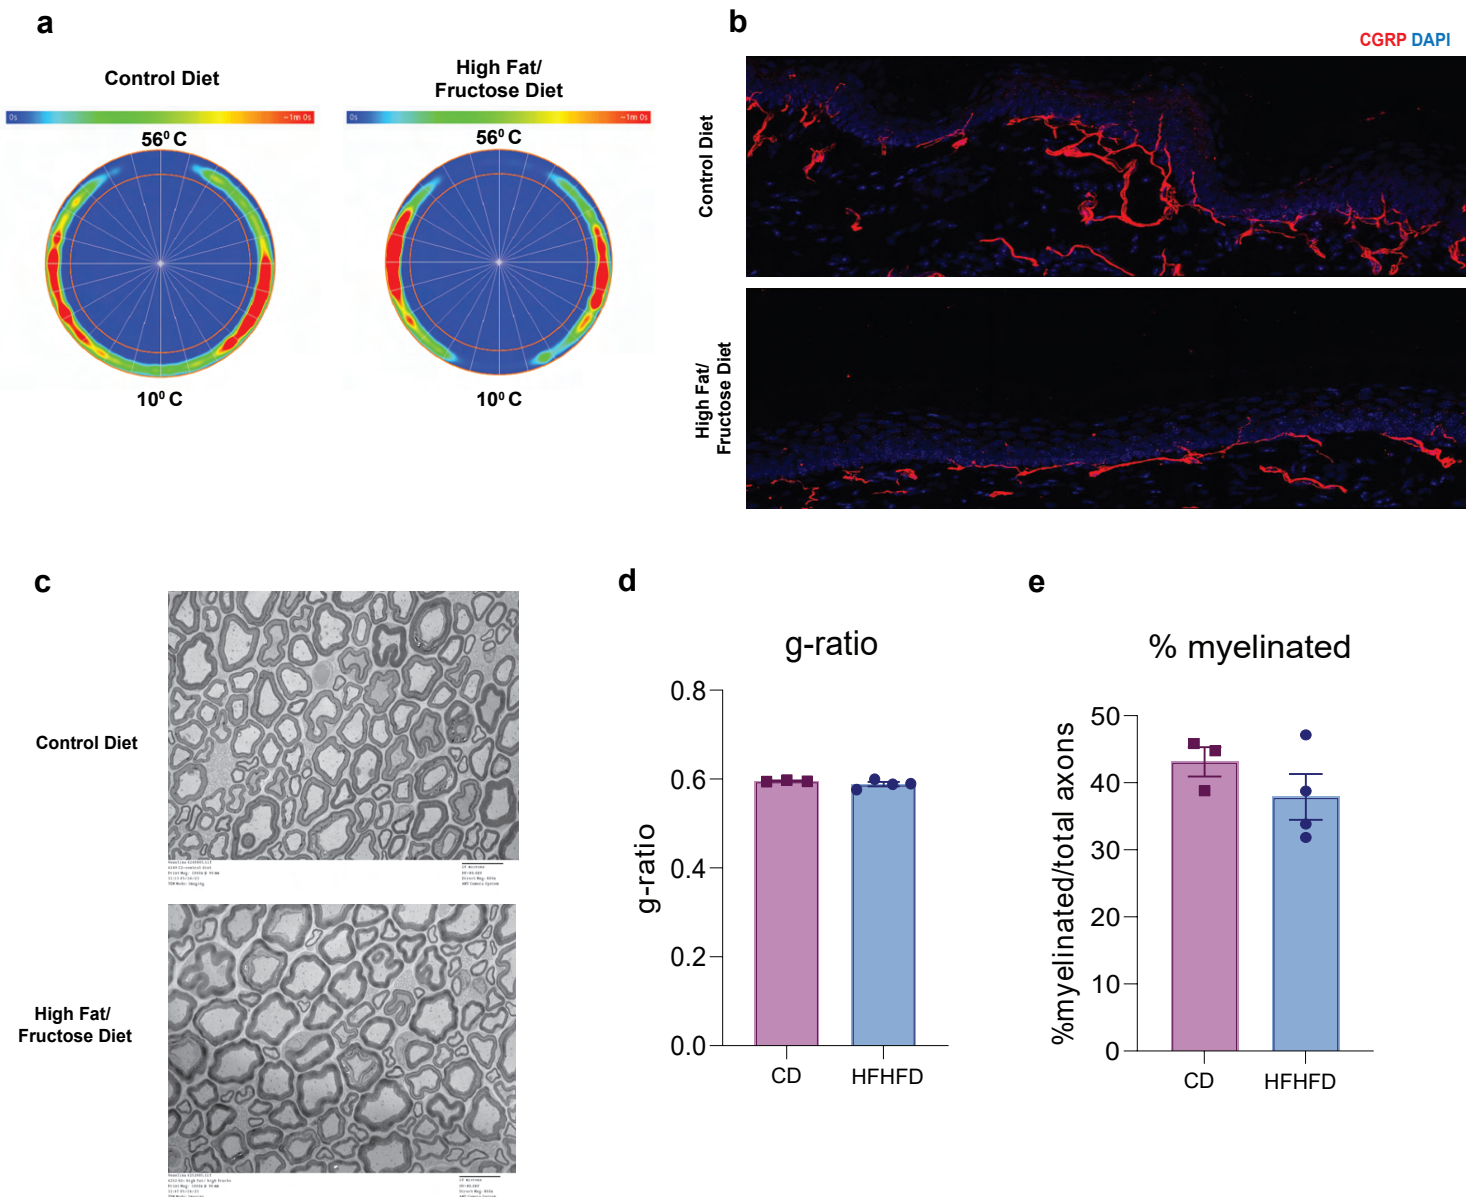

**Fig S2. Behavior and histological parameters tested on CD vs HFHFD fed mice**

**a.** Representative heat maps showing the location of the mouse during a 1-hour thermal gradient ring recording. **b.** Representative immunohistochemistry images with CGRP stained in red and DAPI in blue from CD and HFHFD hind paw skin after 24 weeks of feeding. **c.** Representative EM images from sciatic nerves of mice fed CD and HFHFD for 12 weeks. **d.** Quantification of EM images of g-ratio and **e.** percent myelinated fibers. Each dot represents an average of 2 images from each mouse.

## Figure S3

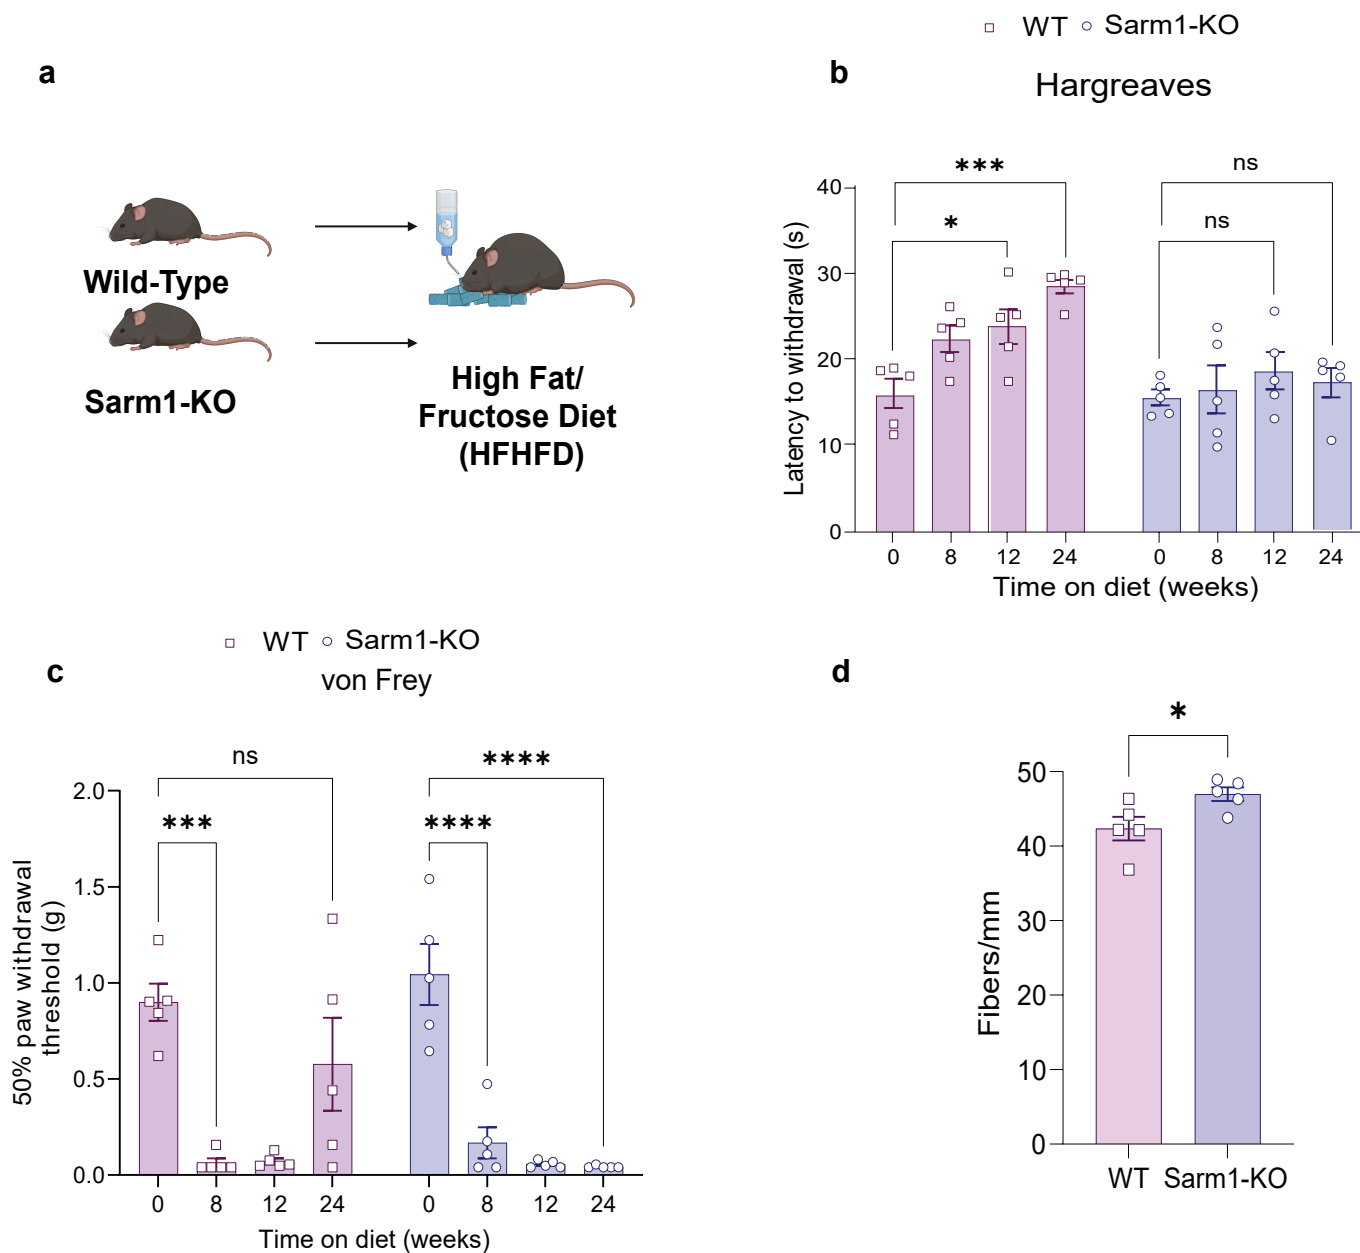

**Fig S3. Sarm1 knockdown prevents the loss of heat sensitivity and skin axonal degeneration in HFHFD-fed mice but leads to persistent mechanical allodynia**

**a.** Illustration of the experiment. **b.** Hargreaves test was used to assess thermal sensitivity in WT vs Sarm1-KO male mice fed HFHFD or CD over 24 weeks. **c.** Von Frey filaments were used to assess mechanical sensitivity in WT vs Sarm1-KO male mice fed HFHFD or CD over 24 weeks. **d.** Quantification of IENFD from PGP9.5 staining in hind paws of skin from WT and Sarm1-KO male mice fed HFHFD or CD for 24 weeks (p-value = 0.0353).

Figure S4

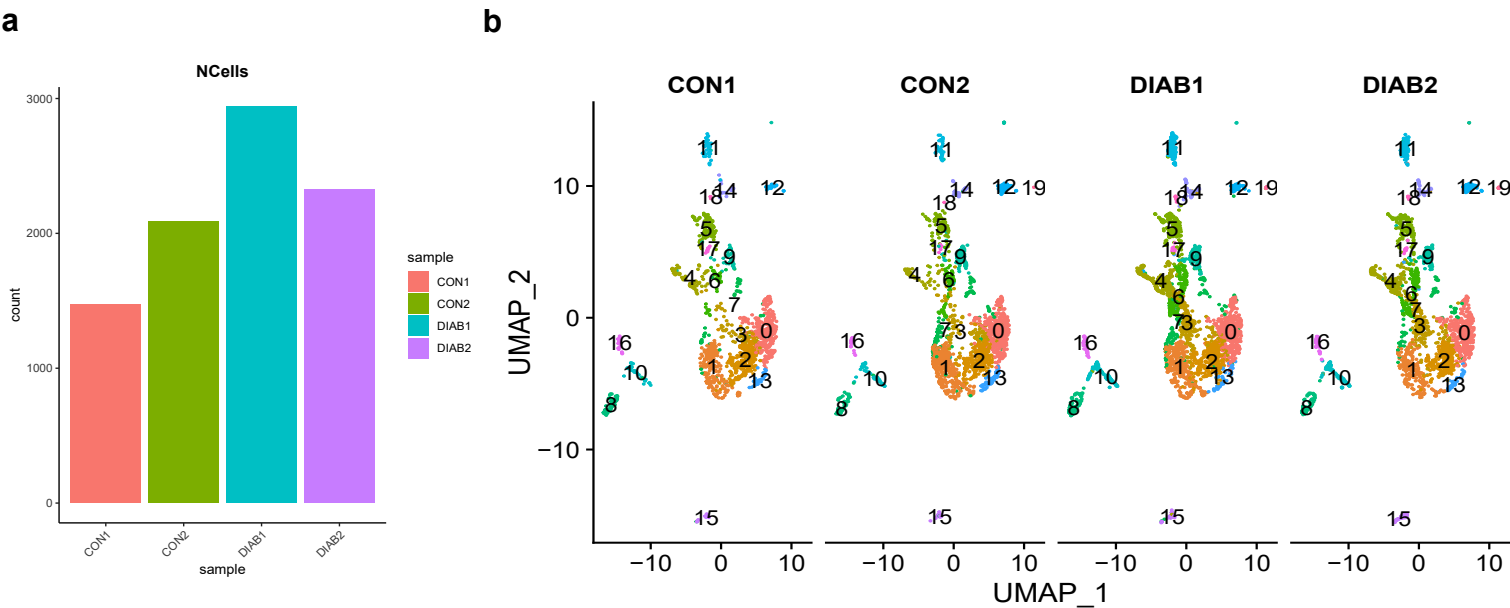

**Fig S4. Sciatic nerve immune cell single cell sequencing**  
**a.** Number of cells analyzed in each sample post-filtering. **b.** UMAP plot showing similar cell composition in replicates of each condition.

**Figure S5**

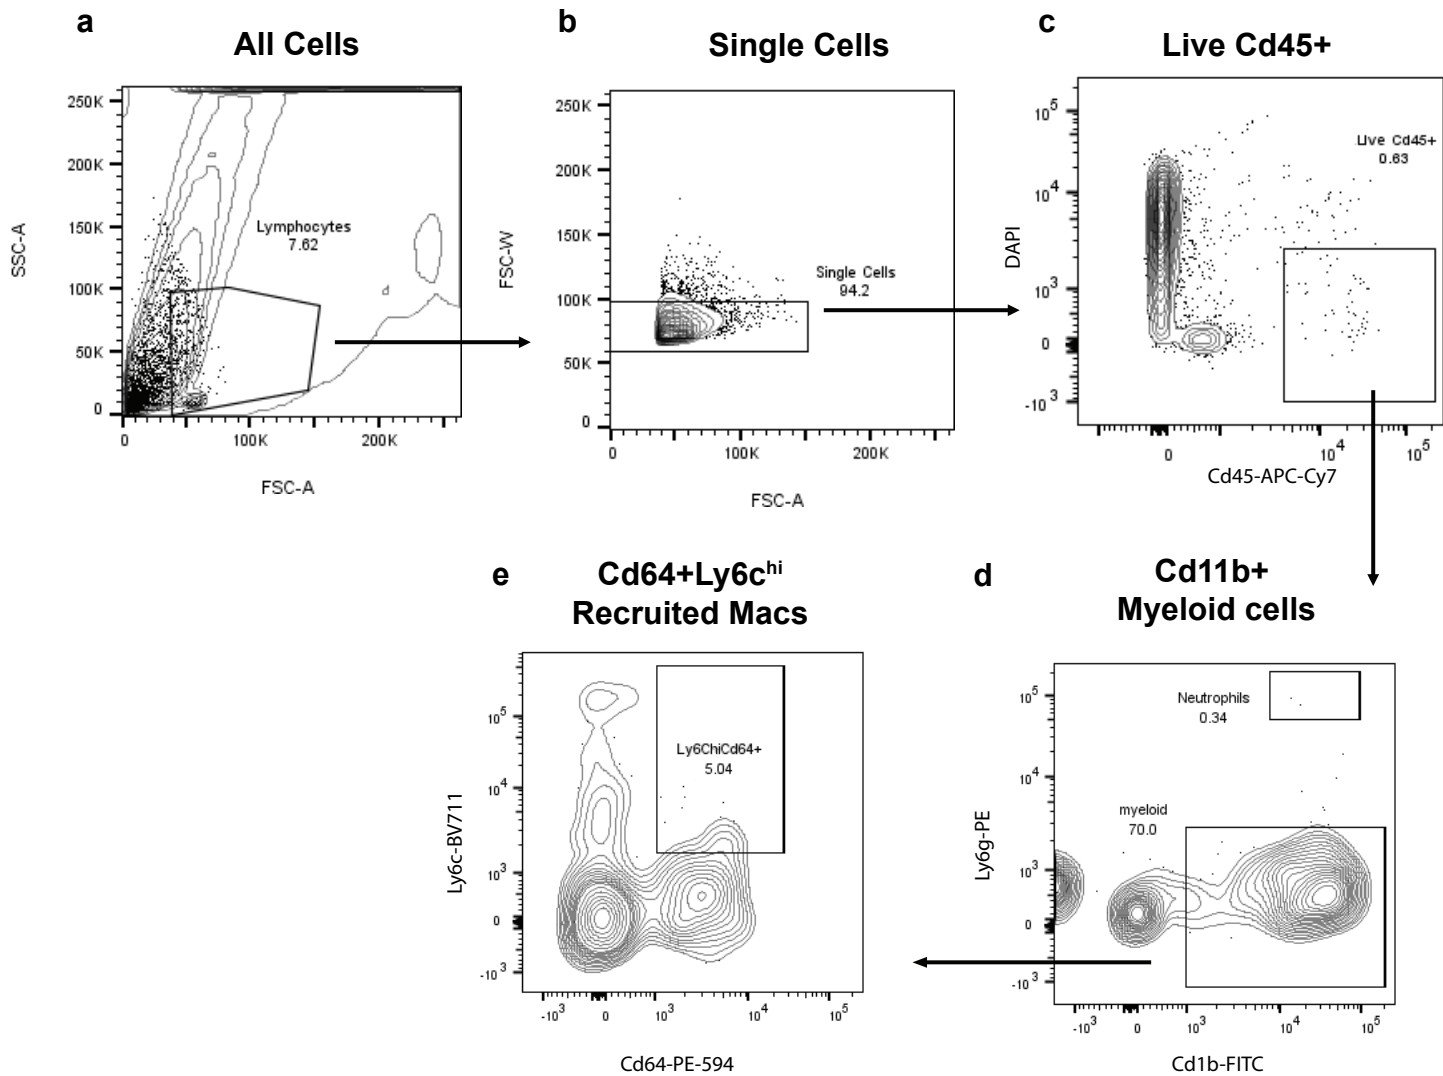

**Fig S5. Gating strategy for flow cytometry assessment of recruited macrophages into the sciatic nerve**

**a.** FSC-A and SSC-A were used to gate on all cells and exclude aggregates and small debris. **b.** FSC-A and FSC-W were used to gate on single cells. **c.** DAPI and CD45-APC-Cy7 were used to capture Live CD45+ immune cells. **d.** Cd11b-FITC and Ly6g-PE were used to gate on myeloid cells and exclude neutrophils. **e.** Cd64-PE-594 and Ly6c-BV711 were used to identify Ly6C+ Cd64+ recruited macrophages.

# Figure S6

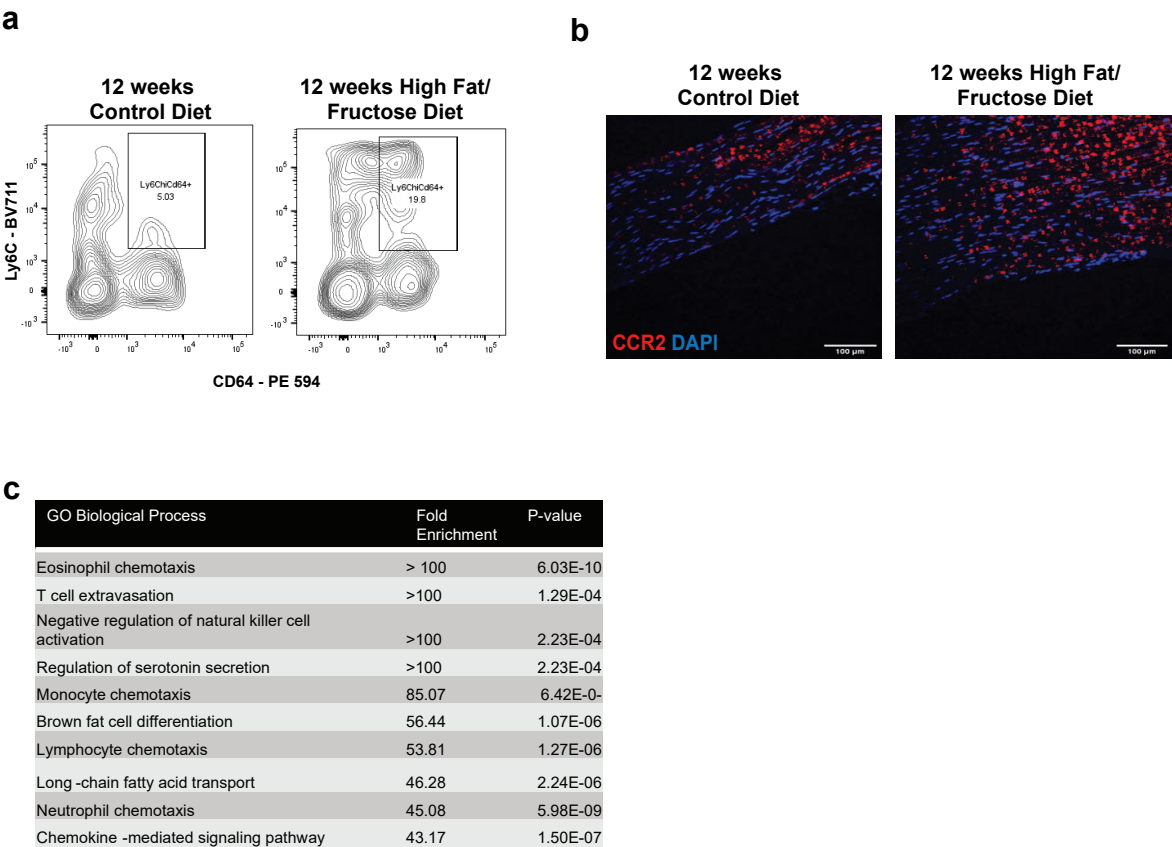

**Fig S6. Changes in recruited and resident macrophages in sciatic nerves of mice fed HFHFD vs CD for 12 weeks**

**a.** Representative flow cytometry contour plot of Ly6C and CD64 gate, pre-gated on Live CD45+*Cd11b*+ showing difference between CD and HFHFD sciatic nerves. **b.** Immunohistochemistry of sciatic nerves showing CCR2 in red, labeling recruited macrophages, and DAPI in blue from mice fed HFHFD vs CD for 12 weeks. **c.** GO pathway analysis from differentially expressed genes in resident resMacs clusters in HFHFD vs CD showing enrichment in chemotaxis pathways.

# Figure S7

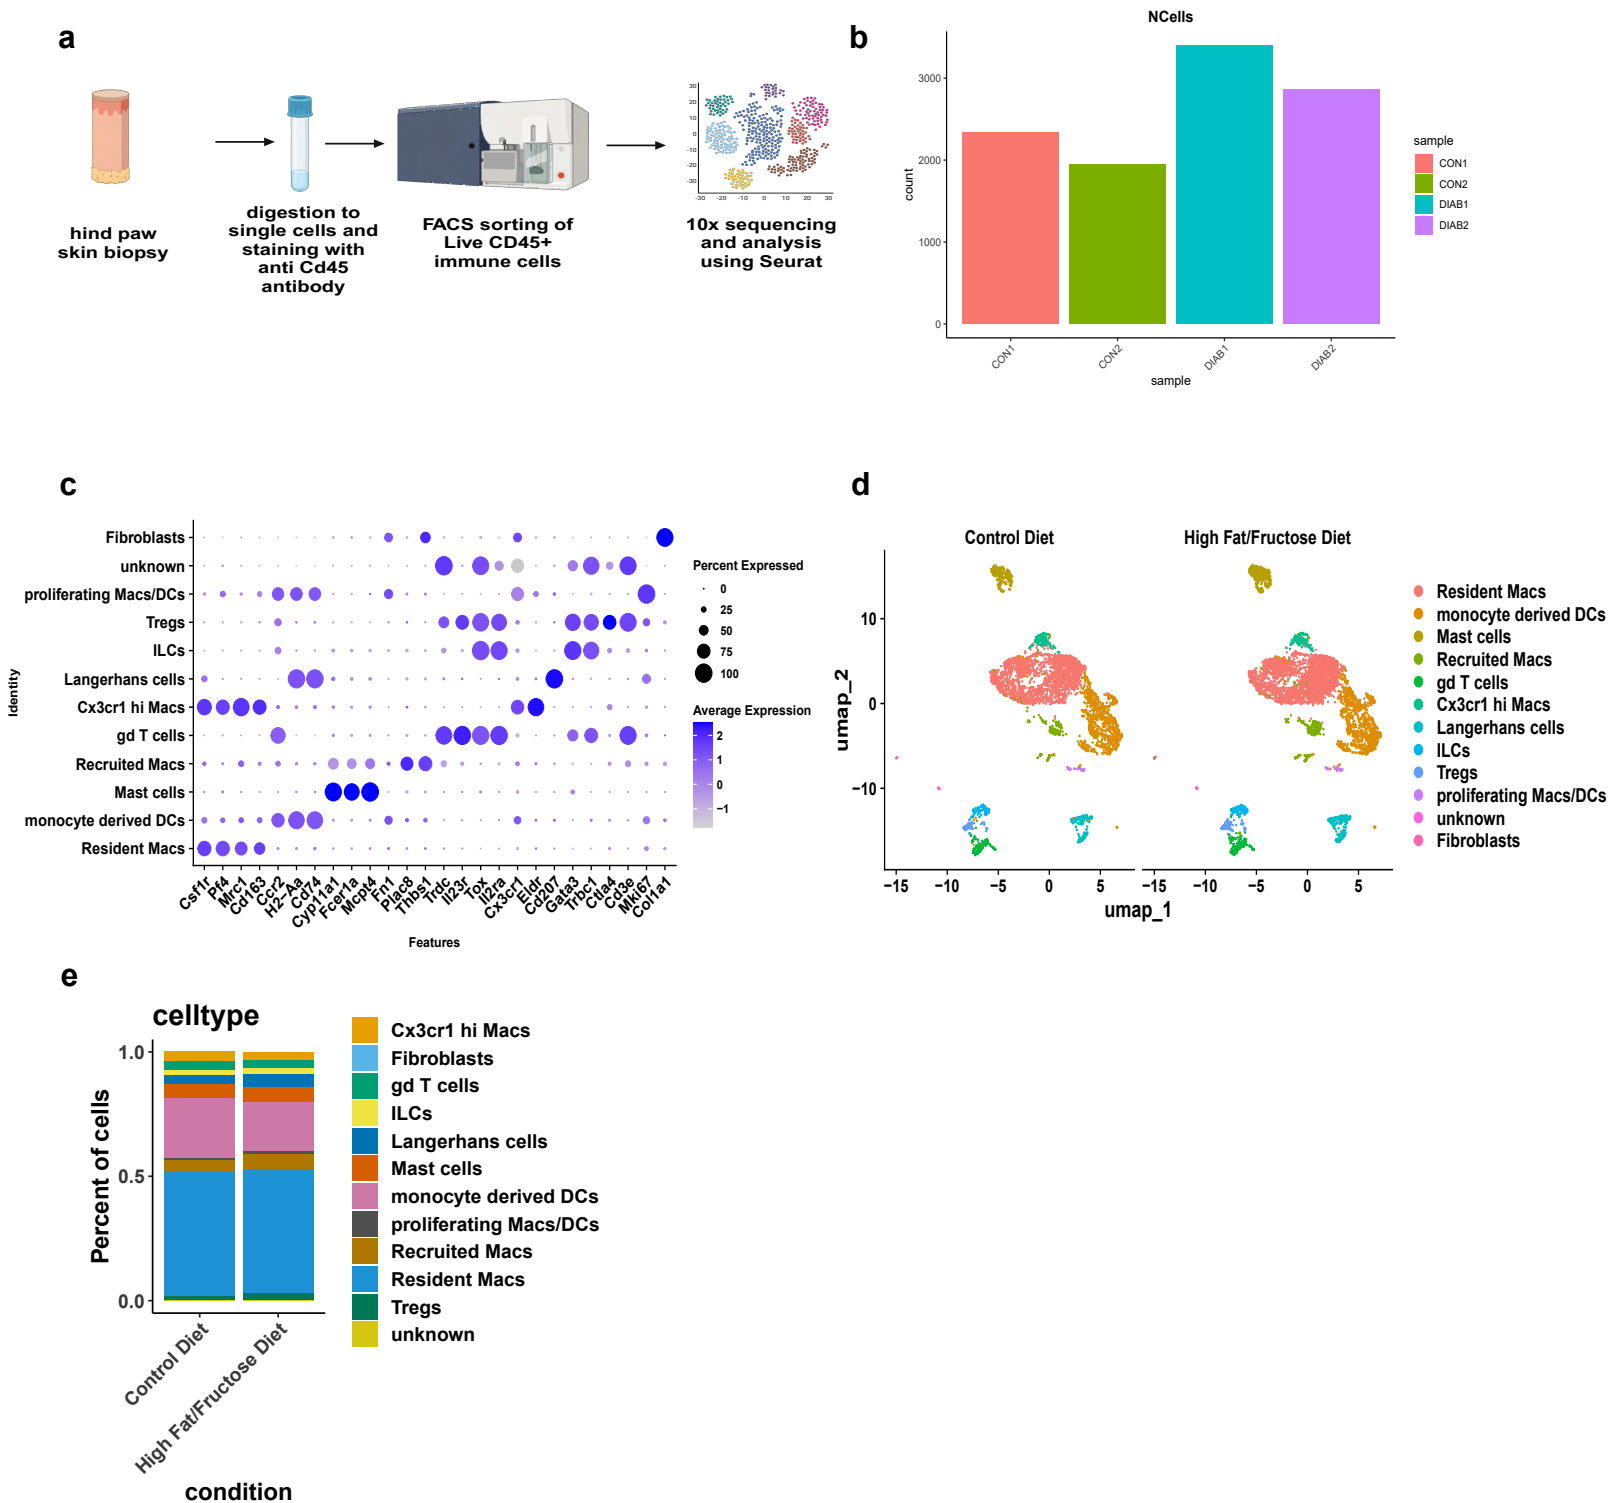

**Fig S7. Single cell sequencing of skin immune cells from mice fed HFHFD or CD for 12 weeks shows no change in immune cell composition**

**a.** Workflow for tissue collection, processing, sorting, and sequencing of skin immune cells from male mice fed HFHFD or CD for 12 weeks from 4 mice per group pooled into 2 samples each group. **b.** Number of cells analyzed in each sample post-filtering. **c.** Dot plot of marker genes used to identify different immune cells in dataset. **d.** UMAP plot showing clusters identified in sciatic nerves of CD and HFHFD fed mice from 2 samples per group. **e.** Barplot showing proportions of the different cell types per group.

Figure S8

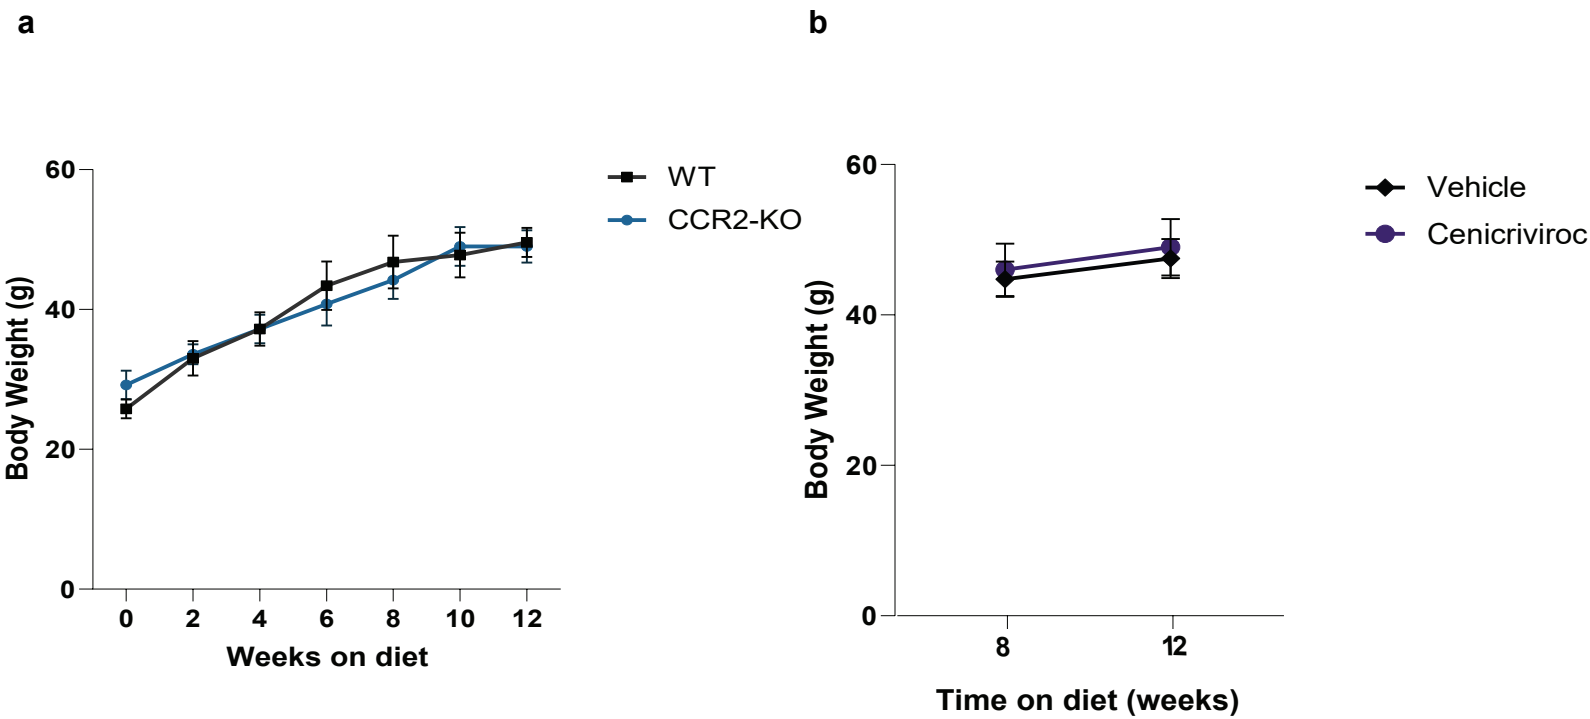

**Fig S8. Blocking macrophage recruitment does not affect body weight gain**  
**a.** Body weight measurements in age matched CCR2-KO and WT mice over 12 weeks on HFHFD (n=5 mice per group). **b.** Body weight measurement of mice injected with CVC or vehicle before start of injections and at the end of experiment (n=4 per group).
